# Supplementary material
Source: PubMed Central journal article supplement (PMC5560867)
Supplement: NIHMS890737-supplement-supplement_1.pdf [file NIHMS890737-supplement-supplement_1.pdf]

ADVANCE EARLY LIFE COHORT

**Appendix:** Supplemental table

**Table S1.** Comparison of characteristics between patients included versus excluded from ADVANCE Early Life Cohort, among patients 0-5 years of age at any time in 2012-2014 (n=285,654)

|                                               | Included <sup>a</sup><br>(n=216,473) | Excluded<br>due to missing/invalid<br>BMI (n=34,210) | Valid BMI, excluded due<br>to >5 years<br>(n=34,971) |
|-----------------------------------------------|--------------------------------------|------------------------------------------------------|------------------------------------------------------|
| Sex                                           |                                      |                                                      |                                                      |
| Male                                          | 110,154 (50.9)                       | 17,683 (51.7)                                        | 17,812 (50.9)                                        |
| Female                                        | 106,319 (49.1)                       | 16,519 (48.3)                                        | 17,159 (49.1)                                        |
| Race-Ethnicity                                |                                      |                                                      |                                                      |
| Asian                                         | 5,451 (2.5)                          | 1,150 (3.4)                                          | 831 (2.4)                                            |
| Native Hawaiian/Pacific Islander              | 1,347 (0.6)                          | 278 (0.8)                                            | 175 (0.5)                                            |
| Black or African American                     | 38,838 (17.9)                        | 6,044 (17.7)                                         | 6,245 (17.9)                                         |
| White                                         | 63,287 (29.2)                        | 9,533 (27.9)                                         | 10,126 (29.0)                                        |
| Other/Unknown                                 | 9,347 (4.3)                          | 2,261 (6.6)                                          | 1,376 (3.9)                                          |
| Hispanic                                      | 98,203 (45.4)                        | 14,944 (43.7)                                        | 16,218 (46.4)                                        |
| Age <sup>a</sup>                              |                                      |                                                      |                                                      |
| 0-<6 months                                   | 24,282 (11.2)                        | 2,342 (6.9)                                          | 0 (0.0)                                              |
| 6 to <12 months                               | 16,061 (7.4)                         | 2,702 (7.9)                                          | 0 (0.0)                                              |
| 12 to <24 months                              | 31,873 (14.7)                        | 3,639 (10.6)                                         | 0 (0.0)                                              |
| 2 to <4 years                                 | 53,269 (24.6)                        | 6,765 (19.8)                                         | 0 (0.0)                                              |
| 4 to <6 years                                 | 90,988 (42.0)                        | 8,411 (24.6)                                         | 0 (0.0)                                              |
| Over 6 years                                  | 0 (0.0)                              | 10,351 (30.3)                                        | 34,971 (100.0)                                       |
| Income as percent of FPL <sup>b</sup>         |                                      |                                                      |                                                      |
| 0-50%                                         | 69,345 (32.0)                        | 10,762 (31.5)                                        | 10,146 (29.0)                                        |
| >50-100%                                      | 53,969 (24.9)                        | 6,996 (20.5)                                         | 7,106 (20.3)                                         |
| >100-138%                                     | 19,973 (9.2)                         | 2,591 (7.6)                                          | 2,790 (8.0)                                          |
| >138%-200%                                    | 7,053 (3.3)                          | 910 (2.7)                                            | 1,050 (3.0)                                          |
| >200%                                         | 16,368 (7.6)                         | 2,236 (6.5)                                          | 5,643 (16.1)                                         |
| Missing or invalid                            | 49,765 (23.0)                        | 10,715 (31.3)                                        | 8,236 (23.6)                                         |
| Insurance status <sup>c</sup>                 |                                      |                                                      |                                                      |
| Uninsured                                     | 25,040 (11.6)                        | 6,185 (18.1)                                         | 4,173 (11.9)                                         |
| Medicaid                                      | 146,810 (67.8)                       | 22,800 (66.7)                                        | 20,715 (59.2)                                        |
| Commercial                                    | 27,710 (12.8)                        | 3,176 (9.3)                                          | 4,022 (11.5)                                         |
| Other public non-portable<br>coverage         | 16,913 (7.8)                         | 2,049 (6.0)                                          | 6,061 (17.3)                                         |
| BMI z-score (age>2 year <sup>d</sup> ; mean)  | 0.41 (1.23)                          | N/A                                                  | 0.57 (1.1)                                           |
| BMI classification (age>2 year <sup>e</sup> ) |                                      |                                                      |                                                      |
| Underweight                                   | 7,607 (5.3)                          | N/A                                                  | 1,121 (3.2)                                          |
| Normal weight                                 | 93,309 (64.7)                        | N/A                                                  | 21,485 (61.4)                                        |
| Overweight                                    | 21,674 (15.0)                        | N/A                                                  | 5,623 (16.1)                                         |
| Obese                                         | 18,270 (12.7)                        | N/A                                                  | 4,737 (13.6)                                         |
| Severe obese                                  | 3,397 (2.4)                          | N/A                                                  | 2,005 (5.7)                                          |
| Missing                                       | 0 (0.0)                              | N/A                                                  | 0 (0.0)                                              |

<sup>a</sup> OCHIN and HCN patients who, between 1/1/2012 and 12/31/2014, had at least one valid BMI measure when they were 0-5 years of age, regardless of weight status

<sup>b</sup> Last known FPL.

<sup>c</sup> At most recent visit

HCN, Health Choice Network; FPL, Federal Poverty Level

<sup>d</sup> BMI not reported for age <2 years because it is not applicable for group with missing BMI (column 2) and for group excluded due to being older than 5 years (column 3)
